# Supplementary material for: Cabozantinib Versus Standard-of-Care Comparators in the Treatment of Advanced/Metastatic Renal Cell Carcinoma in Treatment-naïve Patients: a Systematic Review and Network Meta-Analysis
Source: Springer Nature journal article supplement (doi:10.1007/s11523-018-0559-0), 2018-02-28
Supplement: MOESM1 [file 15497508]

**Title:** Cabozantinib versus standard-of-care comparators in the treatment of advanced/metastatic renal cell carcinoma in treatment-naïve patients: A systematic review and network meta-analysis

**Authors:** Elvira Schmidt<sup>1</sup>, Johanna Lister<sup>1</sup>, Monika Neumann<sup>1</sup>, Witold Wiecek<sup>1</sup>, Shuai Fu<sup>1</sup>, Anne-Lise Vataire<sup>2</sup>, Jelena Sostar<sup>1</sup>, Shengnan Huang<sup>1</sup>, Florence Marteau<sup>2</sup>

**Affiliations:** 1. Analytica LA-SER Intl. Inc, Loerrach, Germany. 2. IPSEN Pharma SAS, Boulogne-Billancourt Cedex, France.

## Supplementary Information

### Contents

|       |                                                       |    |
|-------|-------------------------------------------------------|----|
| 1     | Literature Review .....                               | 2  |
| 1.1   | Search strategy .....                                 | 2  |
| 1.1.1 | Bibliographic data bases .....                        | 2  |
| 1.1.2 | Study registry .....                                  | 10 |
| 1.2   | Search Results .....                                  | 12 |
| 1.2.1 | Overview of the results of the literature search..... | 12 |
| 1.3   | Inclusion and Exclusion Criteria .....                | 13 |
| 2     | Network plots.....                                    | 14 |
| 2.1   | Network of intermediate risk PFS.....                 | 14 |
| 2.2   | Network of poor risk PFS .....                        | 15 |
| 2.3   | Network of overall PFS.....                           | 16 |
| 2.4   | Network of intermediate risk OS .....                 | 17 |
| 2.5   | Network of poor risk OS.....                          | 18 |
| 2.6   | Network of overall OS.....                            | 19 |

# 1 Literature Review

## 1.1 Search strategy

### 1.1.1 Bibliographic data bases

**Table A-1 Medline (including Epub Ahead of Print, In-Process & Other Non-Indexed Citations, Ovid Medline Daily)**

| Database             |                                                                                                                                                                                                                                                                                                                                                                                                                                                                                 | Ovid MEDLINE(R) Epub Ahead of Print, In-Process & Other Non-Indexed Citations, Ovid MEDLINE(R) Daily and Ovid MEDLINE(R) <1946 to Present> |
|----------------------|---------------------------------------------------------------------------------------------------------------------------------------------------------------------------------------------------------------------------------------------------------------------------------------------------------------------------------------------------------------------------------------------------------------------------------------------------------------------------------|--------------------------------------------------------------------------------------------------------------------------------------------|
| Search Platform:     | Ovid                                                                                                                                                                                                                                                                                                                                                                                                                                                                            |                                                                                                                                            |
| Date of Search:      | June 28, 2017 ,                                                                                                                                                                                                                                                                                                                                                                                                                                                                 |                                                                                                                                            |
| Date Range Searched: | [Last Database Update: Ovid MEDLINE(R): June Week 3 2017,<br>Ovid MEDLINE(R) Epub Ahead of Print: Jun 27, 2017,<br>In-Process & Other Non-Indexed Citations: Jun 27, 2017,<br>Ovid MEDLINE(R) Daily: Jun 27, 2017]<br>1946-2017<br>For cabozantinib and tivozanib: restricted to 1980-2017 in the last step<br>For other 1L treatments ( Sunitinib, Pazopanib, Immunotherapy (Ifn-Alpha, Il-2), Bevacizumab, Temozolomide, Sorafenib): restricted to 2009-2017 in the last step |                                                                                                                                            |
| Search Filters Used  | RCT: Cochrane Highly Sensitive Search Strategy for identifying randomized trials in MEDLINE: sensitivity-and precision-maximizing version (2008 revision), slightly widened <sup>1</sup><br>Systematic Reviews: SIGN Search Filter Systematic Reviews <sup>2</sup>                                                                                                                                                                                                              |                                                                                                                                            |
| #                    | Search Terms                                                                                                                                                                                                                                                                                                                                                                                                                                                                    | Hits                                                                                                                                       |
| 1                    | Carcinoma, Renal Cell/                                                                                                                                                                                                                                                                                                                                                                                                                                                          | 28673                                                                                                                                      |
| 2                    | Kidney Neoplasms/                                                                                                                                                                                                                                                                                                                                                                                                                                                               | 63488                                                                                                                                      |
| 3                    | (Renal adj3 (carcinoma\$1 or adenocarcinoma\$1 or cancer\$1 or neoplasm\$1 or tumo?r\$1 or malignanc\$3)).mp.                                                                                                                                                                                                                                                                                                                                                                   | 56267                                                                                                                                      |
| 4                    | (Kidney adj3 (carcinoma\$1 or adenocarcinoma\$1 or cancer\$1 or neoplasm\$1 or tumo?r\$1 or malignanc\$3)).mp.                                                                                                                                                                                                                                                                                                                                                                  | 69233                                                                                                                                      |
| 5                    | (hypernephroma\$1 or nephroid carcinoma\$1 or hypernephroid carcinoma\$1 or grawitz tumo?r\$1).mp.                                                                                                                                                                                                                                                                                                                                                                              | 1539                                                                                                                                       |
| 6                    | (rcc or mrcc or arcc).mp.                                                                                                                                                                                                                                                                                                                                                                                                                                                       | 13549                                                                                                                                      |
| 7                    | or/1-6                                                                                                                                                                                                                                                                                                                                                                                                                                                                          | 86970                                                                                                                                      |
| 8                    | cabozantinib.nm.                                                                                                                                                                                                                                                                                                                                                                                                                                                                | 191                                                                                                                                        |
| 9                    | (cabozantinib\$ or "bms 907351" or bms907351 or "xl 184" or xl184 or cabometyx\$ or cometriq\$).mp.                                                                                                                                                                                                                                                                                                                                                                             | 480                                                                                                                                        |
| 10                   | (1c39jw444g or dr7st46x58).rn.                                                                                                                                                                                                                                                                                                                                                                                                                                                  | 191                                                                                                                                        |
| 11                   | (1140909-48-3 or 849217-68-1).rn.                                                                                                                                                                                                                                                                                                                                                                                                                                               | 0                                                                                                                                          |
| 12                   | or/8-11                                                                                                                                                                                                                                                                                                                                                                                                                                                                         | 480                                                                                                                                        |
| 13                   | Tivozanib.nm.                                                                                                                                                                                                                                                                                                                                                                                                                                                                   | 42                                                                                                                                         |
| 14                   | (tivozanib\$ or "AV-951" or AV951 or "KRN 951" or KRN951 or Kil8951 or "Kil-8951" or tivopath\$ or fotivda\$).mp.                                                                                                                                                                                                                                                                                                                                                               | 103                                                                                                                                        |
| 15                   | 475108-18-0.rn.                                                                                                                                                                                                                                                                                                                                                                                                                                                                 | 0                                                                                                                                          |
| 16                   | 172030934T.rn.                                                                                                                                                                                                                                                                                                                                                                                                                                                                  | 42                                                                                                                                         |

<sup>1</sup> Source: Higgins JPT, Green S (editors). *Cochrane Handbook for Systematic Reviews of Interventions Version 5.1.0 [updated March 2011, cited 25 June 2017]*. The Cochrane Collaboration, 2011. Available from: [www.cochrane-handbook.org](http://www.cochrane-handbook.org).

<sup>2</sup> Source: Scottish Intermediate Guidelines Network (SIGN), Filter Systematic Reviews, URL: <http://sign.ac.uk/search-filters.html>, [Word document last modified 25 Apr 2017, cited 25 June 2017]

|    |                                                                                                                                                                                                                                                                                                                                            |        |
|----|--------------------------------------------------------------------------------------------------------------------------------------------------------------------------------------------------------------------------------------------------------------------------------------------------------------------------------------------|--------|
| 17 | or/13-16                                                                                                                                                                                                                                                                                                                                   | 103    |
| 18 | 12 or 17                                                                                                                                                                                                                                                                                                                                   | 579    |
| 19 | sunitinib.nm.                                                                                                                                                                                                                                                                                                                              | 2992   |
| 20 | (sunitinib\$ or "su 011248" or su011248 or "su 11248" or su11248 or su010398 or "su 010398" or su 10398 or su10398 or "pha-290940ad" or pha290940ad or sutent\$).mp.                                                                                                                                                                       | 5331   |
| 21 | (lvx8n1ut73 or v99t50803m).rn.                                                                                                                                                                                                                                                                                                             | 2992   |
| 22 | (341031-54-7 or 557795-19-4).rn.                                                                                                                                                                                                                                                                                                           | 0      |
| 23 | pazopanib.nm.                                                                                                                                                                                                                                                                                                                              | 588    |
| 24 | (Pazopanib\$ or GW786034\$1 or (GW adj 786034\$1) or GW780604\$1 or (GW adj 780604\$1) or armala\$ or sb710468 or "sb 710468" or votrient\$).mp.                                                                                                                                                                                           | 1264   |
| 25 | (7RN5DR86CK or 33Y9ANM545).rn.                                                                                                                                                                                                                                                                                                             | 588    |
| 26 | (444731-52-6 or 635702-64-6).rn.                                                                                                                                                                                                                                                                                                           | 0      |
| 27 | Interferon-alpha/                                                                                                                                                                                                                                                                                                                          | 27889  |
| 28 | ((interferon or ifn) adj1 (alpha\$ or alfa\$)).mp.                                                                                                                                                                                                                                                                                         | 48316  |
| 29 | (alfaferone or alferon or "alpha ferone" or cilferon or ginterferon or introma or kemron or leukiniferon or leukinferron or "leukocyte interferon" or "refecon a" or "referon a3" or sumiferon or sumipheron or veldona or "Intron A" or Alfatronol or Glucoferon or Urifron or Roferon or Laroferon or Roceron or ifnalpa or ifnalfa).mp. | 3876   |
| 30 | (74899-72-2 or 77907-69-8).rn.                                                                                                                                                                                                                                                                                                             | 0      |
| 31 | 47RRR83SK7.rn.                                                                                                                                                                                                                                                                                                                             | 4619   |
| 32 | Interleukin-2/                                                                                                                                                                                                                                                                                                                             | 37742  |
| 33 | ("interleukin 2" or "interleukin II" or "il-2" or il2 or Ro-23-6019 or Ro236019 or Ro 236019 or RU 49637 or RU49637 or TCGF or T-Cell Growth Factor or T-Cell Stimulating Factor or bioleukin or proleukin or aldesleukin or tsf or Thymocyte Stimulating Factor).mp.                                                                      | 80562  |
| 34 | (102524-44-7 or 110942-02-4).rn.                                                                                                                                                                                                                                                                                                           | 0      |
| 35 | M89N0Q7EQR.rn.                                                                                                                                                                                                                                                                                                                             | 98     |
| 36 | Bevacizumab/                                                                                                                                                                                                                                                                                                                               | 9656   |
| 37 | (bevacizumab\$ or rhuMAB-VEGF or abp 215 or ro4876646 or nsc 704865 or nsc704865 or anti-vegf or avastin\$).mp.                                                                                                                                                                                                                            | 18192  |
| 38 | 2S9ZZM9Q9V.rn.                                                                                                                                                                                                                                                                                                                             | 9656   |
| 39 | 216974-75-3.rn.                                                                                                                                                                                                                                                                                                                            | 0      |
| 40 | Temsirolimus.nm.                                                                                                                                                                                                                                                                                                                           | 807    |
| 41 | (temsirolimus\$ or "cci 779" or "cell-cycle-inhibitor-779" or nsc683864 or "nsc 683864" or torisel\$).mp.                                                                                                                                                                                                                                  | 1506   |
| 42 | 162635-04-3.rn.                                                                                                                                                                                                                                                                                                                            | 0      |
| 43 | 624KN6GM2T.rn.                                                                                                                                                                                                                                                                                                                             | 807    |
| 44 | Sorafenib.nm.                                                                                                                                                                                                                                                                                                                              | 3840   |
| 45 | (sorafenib\$ or "bay 43-9006" or "bay 439006" or "bay43 9006" or bay439006 or "bay 545-9085" or "bay 5459085" or "bay545-9085" or bay5459085 or "bay 54-9085" or "bay 549085" or "bay54-9085" or bay549085 or nexavar\$).mp.                                                                                                               | 6870   |
| 46 | (284461-73-0 or 475207-59-1).rn.                                                                                                                                                                                                                                                                                                           | 0      |
| 47 | (9ZOQ3TZI87 or 5T62Q3B36J).rn.                                                                                                                                                                                                                                                                                                             | 3840   |
| 48 | or/19-47                                                                                                                                                                                                                                                                                                                                   | 155024 |
| 49 | randomized controlled trial.pt.                                                                                                                                                                                                                                                                                                            | 467292 |
| 50 | controlled clinical trial.pt.                                                                                                                                                                                                                                                                                                              | 94249  |
| 51 | randomi?ed.ti,ab.                                                                                                                                                                                                                                                                                                                          | 524123 |
| 52 | placebo.ti,ab.                                                                                                                                                                                                                                                                                                                             | 195947 |
| 53 | clinical trials as topic.sh.                                                                                                                                                                                                                                                                                                               | 187000 |

|           |                                                 |             |
|-----------|-------------------------------------------------|-------------|
| 54        | randomly.ti,ab.                                 | 284880      |
| 55        | trial.ti,ab.                                    | 503546      |
| 56        | or/49-55                                        | 1328541     |
| 57        | 56 not (exp animals/ not humans.sh.)            | 1221457     |
| 58        | Meta-Analysis as Topic/                         | 16142       |
| 59        | (meta analy\$ or metaanaly\$).tw.               | 118521      |
| 60        | Meta-Analysis/                                  | 82096       |
| 61        | (systematic adj (review\$1 or overview\$1)).tw. | 106897      |
| 62        | exp Review Literature as Topic/                 | 9583        |
| 63        | cochrane.ab.                                    | 54991       |
| 64        | embase.ab.                                      | 58053       |
| 65        | (psychlit or psychlit).ab.                      | 940         |
| 66        | (psychinfo or psycinfo).ab.                     | 18979       |
| 67        | (cinahl or cinhal).ab.                          | 18781       |
| 68        | science citation index.ab.                      | 2699        |
| 69        | bids.ab.                                        | 447         |
| 70        | cancerlit.ab.                                   | 659         |
| 71        | reference list\$.ab.                            | 14475       |
| 72        | bibliograph\$.ab.                               | 15305       |
| 73        | hand-search\$.ab.                               | 5632        |
| 74        | relevant journals.ab.                           | 1021        |
| 75        | manual search\$.ab.                             | 3538        |
| 76        | selection criteria.ab. and review/              | 17484       |
| 77        | data extraction.ab. and review/                 | 10738       |
| 78        | or/58-77                                        | 255226      |
| 79        | 78 not (comment/ or letter/ or editorial/)      | 244576      |
| 80        | 79 not (exp animals/ not humans.sh.)            | 241897      |
| 81        | 7 and 18                                        | 177         |
| 82        | 57 and 81                                       | 63          |
| 83        | 80 and 81                                       | 9           |
| 84        | 82 or 83                                        | 65          |
| 85        | limit 84 to yr="1980 -Current"                  | 65          |
| 86        | 7 and 48                                        | 7282        |
| 87        | 57 and 86                                       | 1937        |
| 88        | 80 and 86                                       | 161         |
| 89        | 87 or 88                                        | 1996        |
| 90        | limit 89 to yr="2009 -Current"                  | 1030        |
| <b>91</b> | <b>85 or 90</b>                                 | <b>1058</b> |

**Table A-2 Embase**

| Database             |                                                                                                                                                                        | Embase                                                                                                                                                                                                                                                    |
|----------------------|------------------------------------------------------------------------------------------------------------------------------------------------------------------------|-----------------------------------------------------------------------------------------------------------------------------------------------------------------------------------------------------------------------------------------------------------|
| Search Platform:     |                                                                                                                                                                        | Ovid SP                                                                                                                                                                                                                                                   |
| Date of Search:      |                                                                                                                                                                        | Jun 28, 2017 [Last Database Update: Jun 26, 2017]                                                                                                                                                                                                         |
| Date Range Searched: |                                                                                                                                                                        | 1974-2017<br>For cabozantinib and tivozanib: restricted to 1980-2017 in the last step<br>For other 1L treatments ( Sunitinib, Pazopanib, Immunotherapy (Ifn-Alpha, Il-2), Bevacizumab, Temsirolimus, Sorafenib): restricted to 2009-2017 in the last step |
| Search Filters Used  |                                                                                                                                                                        | <u>RCT</u> : SIGN Search Strategy Randomized Controlled Trials <sup>3</sup><br><u>Systematic Reviews</u> : SIGN Search Filter Systematic Reviews <sup>4</sup>                                                                                             |
| #                    | Search Terms                                                                                                                                                           | Hits                                                                                                                                                                                                                                                      |
| 1                    | exp kidney carcinoma/                                                                                                                                                  | 57692                                                                                                                                                                                                                                                     |
| 2                    | exp kidney tumor/                                                                                                                                                      | 116353                                                                                                                                                                                                                                                    |
| 3                    | (Renal adj3 (carcinoma\$1 or adenocarcinoma\$1 or cancer\$1 or neoplasm\$1 or tumo?r\$1 or malignanc\$3)).mp.                                                          | 73130                                                                                                                                                                                                                                                     |
| 4                    | (Kidney adj3 (carcinoma\$1 or adenocarcinoma\$1 or cancer\$1 or neoplasm\$1 or tumo?r\$1 or malignanc\$3)).mp.                                                         | 103877                                                                                                                                                                                                                                                    |
| 5                    | (hypernephroma\$1 or nephroid carcinoma\$1 or hypernephroid carcinoma\$1 or grawitz tumo?r\$1).mp.                                                                     | 1628                                                                                                                                                                                                                                                      |
| 6                    | (rcc or mrcc or arcc).mp.                                                                                                                                              | 21959                                                                                                                                                                                                                                                     |
| 7                    | or/1-6                                                                                                                                                                 | 135513                                                                                                                                                                                                                                                    |
| 8                    | Cabozantinib/                                                                                                                                                          | 1790                                                                                                                                                                                                                                                      |
| 9                    | (cabozantinib\$ or "bms 907351" or bms907351 or "xl 184" or xl184 or cabometryx\$ or cometriq\$).mp.                                                                   | 2085                                                                                                                                                                                                                                                      |
| 10                   | (1c39jw444g or dr7st46x58).rn.                                                                                                                                         | 0                                                                                                                                                                                                                                                         |
| 11                   | (1140909-48-3 or 849217-68-1).rn.                                                                                                                                      | 1544                                                                                                                                                                                                                                                      |
| 12                   | or/8-11                                                                                                                                                                | 2085                                                                                                                                                                                                                                                      |
| 13                   | tivozanib/                                                                                                                                                             | 414                                                                                                                                                                                                                                                       |
| 14                   | (tivozanib\$ or "AV-951" or AV951 or "KRN 951" or KRN951 or Kil8951 or "Kil-8951" or tivopath\$ or fotivda\$).mp.                                                      | 490                                                                                                                                                                                                                                                       |
| 15                   | 475108-18-0.rn.                                                                                                                                                        | 346                                                                                                                                                                                                                                                       |
| 16                   | 172030934t.rn.                                                                                                                                                         | 0                                                                                                                                                                                                                                                         |
| 17                   | or/13-16                                                                                                                                                               | 490                                                                                                                                                                                                                                                       |
| 18                   | 12 or 17                                                                                                                                                               | 2498                                                                                                                                                                                                                                                      |
| 19                   | Sunitinib/                                                                                                                                                             | 18432                                                                                                                                                                                                                                                     |
| 20                   | (sunitinib\$ or "su 011248" or su011248 or "su 11248" or su11248 or su010398 or "su 010398" or su 10398 or su10398 or "pha-290940ad" or pha290940ad or sutedent\$).mp. | 18907                                                                                                                                                                                                                                                     |
| 21                   | (lvx8n1ut73 or v99t50803m).rn.                                                                                                                                         | 0                                                                                                                                                                                                                                                         |
| 22                   | (341031-54-7 or 557795-19-4).rn.                                                                                                                                       | 14922                                                                                                                                                                                                                                                     |
| 23                   | Pazopanib/                                                                                                                                                             | 5463                                                                                                                                                                                                                                                      |

<sup>3</sup> Source: Scottish Intermediate Guidelines Network (SIGN), Filter Randomized Controlled Trials  
 URL: <http://sign.ac.uk/search-filters.html>, [Word document last modified 25 Apr 2017, cited 25 June 2017], Filter supplemented by an additional search term, mere animal studies excluded.

<sup>4</sup> Source: Scottish Intermediate Guidelines Network (SIGN), Filter Systematic Reviews  
 URL: <http://sign.ac.uk/search-filters.html>, [Word document last modified 25 Apr 2017, cited 25 June 2017]

|    |                                                                                                                                                                                                                                                                                                                                            |        |
|----|--------------------------------------------------------------------------------------------------------------------------------------------------------------------------------------------------------------------------------------------------------------------------------------------------------------------------------------------|--------|
| 24 | (Pazopanib\$ or GW786034\$1 or (GW adj 786034\$1) or GW780604\$1 or (GW adj 780604\$1) or armala\$ or sb710468 or "sb 710468" or votrient\$).mp.                                                                                                                                                                                           | 5595   |
| 25 | (7rn5dr86ck or 33y9anm545).rn.                                                                                                                                                                                                                                                                                                             | 0      |
| 26 | (444731-52-6 or 635702-64-6).rn.                                                                                                                                                                                                                                                                                                           | 4559   |
| 27 | Alpha interferon/                                                                                                                                                                                                                                                                                                                          | 50175  |
| 28 | ((interferon or ifn) adj1 (alpha\$ or alfa\$)).mp.                                                                                                                                                                                                                                                                                         | 86323  |
| 29 | (alfaferone or alferon or "alpha ferone" or cilferon or ginterferon or introma or kemron or leukiniferon or leukinferron or "leukocyte interferon" or "refecon a" or "referon a3" or sumiferon or sumipheron or veldona or "Intron A" or Alfatronol or Glucoferon or Urifron or Roferon or Laroferon or Roceron or ifnalpa or ifnalpa).mp. | 10397  |
| 30 | (74899-72-2 or 77907-69-8).rn.                                                                                                                                                                                                                                                                                                             | 0      |
| 31 | 47rrr83sk7.rn.                                                                                                                                                                                                                                                                                                                             | 0      |
| 32 | Interleukin-2/                                                                                                                                                                                                                                                                                                                             | 84004  |
| 33 | ("interleukin 2" or "interleukin II" or "il-2" or il2 or Ro-23-6019 or Ro236019 or Ro 236019 or RU 49637 or RU49637 or TCGF or T-Cell Growth Factor or T-Cell Stimulating Factor or bioleukin or proleukin or aldesleukin or tsf or Thymocyte Stimulating Factor).mp.                                                                      | 127620 |
| 34 | (102524-44-7 or 110942-02-4).rn.                                                                                                                                                                                                                                                                                                           | 6119   |
| 35 | m89n0q7eqr.rn.                                                                                                                                                                                                                                                                                                                             | 0      |
| 36 | bevacizumab/                                                                                                                                                                                                                                                                                                                               | 45802  |
| 37 | (bevacizumab\$ or rhumab-vegf or abp 215 or ro4876646 or nsc 704865 or nsc704865 or anti-vegf or avastin\$).mp.                                                                                                                                                                                                                            | 50782  |
| 38 | 2s9zrm9q9v.rn.                                                                                                                                                                                                                                                                                                                             | 0      |
| 39 | 216974-75-3.rn.                                                                                                                                                                                                                                                                                                                            | 38082  |
| 40 | temsirolimus/                                                                                                                                                                                                                                                                                                                              | 7072   |
| 41 | (temsirolimus\$ or "cci 779" or "cell-cycle-inhibitor-779" or nsc683864 or "nsc 683864" or torisel\$).mp.                                                                                                                                                                                                                                  | 7263   |
| 42 | 624kn6gm2t.rn.                                                                                                                                                                                                                                                                                                                             | 0      |
| 43 | 162635-04-3.rn.                                                                                                                                                                                                                                                                                                                            | 6093   |
| 44 | sorafenib/                                                                                                                                                                                                                                                                                                                                 | 22479  |
| 45 | (sorafenib\$ or "bay 43-9006" or "bay 439006" or "bay43 9006" or bay439006 or "bay 545-9085" or "bay 5459085" or "bay545-9085" or bay5459085 or "bay 54-9085" or "bay 549085" or "bay54-9085" or bay549085 or nexavar\$).mp.                                                                                                               | 23129  |
| 46 | (284461-73-0 or 475207-59-1).rn.                                                                                                                                                                                                                                                                                                           | 17721  |
| 47 | (9zoq3tzi87 or 5t62q3b36j).rn.                                                                                                                                                                                                                                                                                                             | 0      |
| 48 | or/19-47                                                                                                                                                                                                                                                                                                                                   | 280009 |
| 49 | clinical trial/                                                                                                                                                                                                                                                                                                                            | 932258 |
| 50 | randomized controlled trial/                                                                                                                                                                                                                                                                                                               | 458556 |
| 51 | controlled clinical trial/                                                                                                                                                                                                                                                                                                                 | 437367 |
| 52 | multicenter study/                                                                                                                                                                                                                                                                                                                         | 158354 |
| 53 | Phase 3 clinical trial/ or Phase 4 clinical trial/                                                                                                                                                                                                                                                                                         | 30803  |
| 54 | exp randomization/                                                                                                                                                                                                                                                                                                                         | 74481  |
| 55 | Single Blind Procedure/                                                                                                                                                                                                                                                                                                                    | 27966  |
| 56 | Double Blind Procedure/                                                                                                                                                                                                                                                                                                                    | 140243 |
| 57 | Crossover Procedure/                                                                                                                                                                                                                                                                                                                       | 52092  |
| 58 | Placebo/                                                                                                                                                                                                                                                                                                                                   | 308963 |
| 59 | Randomized controlled trial\$.tw.                                                                                                                                                                                                                                                                                                          | 161718 |
| 60 | rct.tw.                                                                                                                                                                                                                                                                                                                                    | 24705  |

|            |                                                                         |             |
|------------|-------------------------------------------------------------------------|-------------|
| 61         | (random\$ adj2 allocat\$).tw.                                           | 34322       |
| 62         | ((single or double or treble or triple) adj blind\$).tw.                | 198362      |
| 63         | Placebo\$.tw.                                                           | 257316      |
| 64         | Prospective Study/                                                      | 386717      |
| 65         | Randomi#ed.ti.                                                          | 192913      |
| 66         | or/49-65                                                                | 1850244     |
| 67         | 66 not (Case study/ or case report.tw. or abstract report/ or note.pt.) | 1799867     |
| 68         | 67 not (exp animal/ not exp human/)                                     | 1737657     |
| 69         | exp Meta Analysis/                                                      | 129377      |
| 70         | ((meta adj analy\$) or metaanalys\$).tw.                                | 148423      |
| 71         | (systematic adj (review\$1 or overview\$1)).tw.                         | 127540      |
| 72         | cancerlit.ab.                                                           | 704         |
| 73         | cochrane.ab.                                                            | 67932       |
| 74         | embase.ab.                                                              | 70007       |
| 75         | (psychlit or psyclit).ab.                                               | 972         |
| 76         | (psychinfo or psycinfo).ab.                                             | 16532       |
| 77         | (cinahl or cinhal).ab.                                                  | 20653       |
| 78         | science citation index.ab.                                              | 2970        |
| 79         | bids.ab.                                                                | 550         |
| 80         | reference lists.ab.                                                     | 14852       |
| 81         | bibliograph\$.ab.                                                       | 18642       |
| 82         | hand-search\$.ab.                                                       | 6457        |
| 83         | manual search\$.ab.                                                     | 4021        |
| 84         | relevant journals.ab.                                                   | 1152        |
| 85         | selection criteria.ab. and review.pt.                                   | 12605       |
| 86         | data extraction.ab. and review.pt.                                      | 9766        |
| 87         | or/69-86                                                                | 306284      |
| 88         | 87 not (letter or editorial).pt.                                        | 299011      |
| 89         | 88 not (exp animal/ not exp human/)                                     | 296252      |
| 90         | 7 and 18                                                                | 782         |
| 91         | 68 and 90                                                               | 330         |
| 92         | 89 and 90                                                               | 36          |
| 93         | 91 or 92                                                                | 338         |
| 94         | limit 93 to yr="1980 -Current"                                          | 337         |
| 95         | 7 and 48                                                                | 18314       |
| 96         | 68 and 95                                                               | 5729        |
| 97         | 89 and 95                                                               | 449         |
| 98         | 96 or 97                                                                | 5887        |
| 99         | limit 98 to yr="2009 -Current"                                          | 3367        |
| <b>100</b> | <b>94 or 99</b>                                                         | <b>3449</b> |

**Table A-3 Cochrane Library**

| Databases            |                                                                                                                                                                                                                                                                                                                                                | Cochrane Library (incl. Cochrane CENTRAL, Cochrane Reviews, DARE, NHSEED, HTA) |
|----------------------|------------------------------------------------------------------------------------------------------------------------------------------------------------------------------------------------------------------------------------------------------------------------------------------------------------------------------------------------|--------------------------------------------------------------------------------|
| Search Platform:     | Cochrane Library (Wiley), all databases included, see below                                                                                                                                                                                                                                                                                    |                                                                                |
| Date of Search:      | June 28, 2017 [Last Database Update: Cochrane Central Register of Controlled Trials: May 2017, Cochrane Reviews: June 2017, Other Reviews (DARE): April 2015, HTA Database: October 2016, NHSEED: April 2015),                                                                                                                                 |                                                                                |
| Date Range Searched: | For cabozantinib and tivozanib: restricted to 1980-2017 in the last step<br>For other 1L treatments ( Sunitinib, Pazopanib, Immunotherapy (Ifn-Alpha, Il-2), Bevacizumab, Temsirolimus, Sorafenib): restricted to 2009-2017 in the last step                                                                                                   |                                                                                |
| Search Filters Used  | none                                                                                                                                                                                                                                                                                                                                           |                                                                                |
| #                    | Search Terms                                                                                                                                                                                                                                                                                                                                   | Hits                                                                           |
| #1                   | [mh ^"Carcinoma, Renal Cell"]                                                                                                                                                                                                                                                                                                                  | 585                                                                            |
| #2                   | [mh ^"kidney neoplasms"]                                                                                                                                                                                                                                                                                                                       | 764                                                                            |
| #3                   | (renal near/3 (carcinoma* or adenocarcinoma* or cancer* or neoplasm* or tumor* or tumour*)):ab,ti,kw                                                                                                                                                                                                                                           | 1849                                                                           |
| #4                   | (kidney near/3 (carcinoma* or adenocarcinoma* or cancer* or neoplasm* or tumor* or tumour*)):ab,ti,kw                                                                                                                                                                                                                                          | 1746                                                                           |
| #5                   | mrcc:ab,ti,kw or rcc:ab,ti,kw or arcc:ab,ti,kw or hypernephroma*:ab,ti,kw or (nephroid next/1 carcinoma*):ab,ti,kw or (hypernephroid next/1 carcinoma*):ab,ti,kw or (grawitz next/1 tumor*):ab,ti,kw or (grawitz next/1 tumour*):ab,ti,kw                                                                                                      | 797                                                                            |
| #6                   | #1 or #2 or #3 or #4 or #5                                                                                                                                                                                                                                                                                                                     | 2466                                                                           |
| #7                   | cabozantinib*:ab,ti,kw                                                                                                                                                                                                                                                                                                                         | 104                                                                            |
| #8                   | ("bms 907351" or bms907351 or "xl 184" or xl184 or cabometyx* or cometriq*):ab,ti,kw                                                                                                                                                                                                                                                           | 28                                                                             |
| #9                   | #7 or #8                                                                                                                                                                                                                                                                                                                                       | 105                                                                            |
| #10                  | Tivozanib*:ab,ti,kw                                                                                                                                                                                                                                                                                                                            | 31                                                                             |
| #11                  | ("AV-951" or AV951 or "KRN 951" or KRN951 or "Kil-8951" or tivopath* or fotivda*):ab,ti,kw                                                                                                                                                                                                                                                     | 5                                                                              |
| #12                  | #10 or #11                                                                                                                                                                                                                                                                                                                                     | 32                                                                             |
| #13                  | #9 or #12                                                                                                                                                                                                                                                                                                                                      | 136                                                                            |
| #14                  | Sunitinib*:ab,ti,kw                                                                                                                                                                                                                                                                                                                            | 596                                                                            |
| #15                  | (sutent* or "pha-290940ad" or pha290940ad or "su 011248" or su011248 or "su 11248" or su11248 or su010398 or "su 010398" or "su 10398" or su10398):ab,ti,kw                                                                                                                                                                                    | 18                                                                             |
| #16                  | Pazopanib*:ab,ti,kw                                                                                                                                                                                                                                                                                                                            | 251                                                                            |
| #17                  | (GW786034* or (GW next 786034*) or GW780604* or (GW next 780604*) or armala* or sb710468 or "sb 710468" or votrient*):ab,ti,kw                                                                                                                                                                                                                 | 11                                                                             |
| #18                  | [mh Interferon-alpha]                                                                                                                                                                                                                                                                                                                          | 2878                                                                           |
| #19                  | ((interferon or ifn) near/1 (alpha* or alfa*)):ab,ti,kw                                                                                                                                                                                                                                                                                        | 5969                                                                           |
| #20                  | (alfaferone or alferon or "alpha ferone" or cilferon or ginterferon or introna or kemron or leukinferon or leukinferron or "leukocyte interferon" or "refecon a" or "referon a3" or sumiferon or sumipheron or veldona or "Intron A" or Alfatronol or Glucoferon or Urifron or Roferon or Laroferon or Roceron or ifnalpa or ifnalfa):ab,ti,kw | 460                                                                            |
| #21                  | [mh Interleukin-2]                                                                                                                                                                                                                                                                                                                             | 868                                                                            |
| #22                  | ("interleukin 2" or "interleukin II" or "il-2" or il2 or Ro-23-6019 or Ro236019 or Ro 236019 or RU 49637 or RU49637 or TCGF or T-Cell Growth Factor or T-Cell Stimulating Factor or bioleukin or proleukin or aldesleukin or tsf or Thymocyte Stimulating Factor):ab,ti,kw                                                                     | 3606                                                                           |
| #23                  | [mh bevacizumab]                                                                                                                                                                                                                                                                                                                               | 710                                                                            |
| #24                  | ("rhuMAb-VEGF" or "abp 215" or ro4876646 or "nsc 704865" or nsc704865 or "anti-vegf" or avastin*):ab,ti,kw                                                                                                                                                                                                                                     | 548                                                                            |
| #25                  | Temsirolimus*:ab,ti,kw                                                                                                                                                                                                                                                                                                                         | 181                                                                            |
| #26                  | ("cci 779" or "cell-cycle-inhibitor-779" or nsc683864 or "nsc 683864" or torisel*):ti,ab,kw                                                                                                                                                                                                                                                    | 24                                                                             |
| #27                  | sorafenib:ab,ti,kw                                                                                                                                                                                                                                                                                                                             | 808                                                                            |



|            |                                                                                                                                                                                                                 |            |
|------------|-----------------------------------------------------------------------------------------------------------------------------------------------------------------------------------------------------------------|------------|
| #28        | ("bay 43-9006" or bay 439006 or "bay43 9006" or bay439006 or "bay 545-9085" or "bay 5459085" or "bay545-9085" or bay5459085 or "bay 54-9085" or "bay 549085" or "bay54-9085" or bay549085 or nexavar*):ab,ti,kw | 34         |
| #29        | #14 or #15 or #16 or #17 or #18 or #19 or #20 or #21 or #22 or #23 or #24 or #25 or #26 or #27 or #28                                                                                                           | 11846      |
| #30        | #6 and #13                                                                                                                                                                                                      | 53         |
| #31        | #30 in Cochrane Reviews (Reviews and Protocols), Other Reviews, Trials, Technology Assessments and Economic Evaluations                                                                                         | 53         |
| #32        | #31 Publication Year from 1980 to 2017                                                                                                                                                                          | 53         |
| #33        | #6 and #29                                                                                                                                                                                                      | 908        |
| #34        | #33 in Cochrane Reviews (Reviews and Protocols), Other Reviews, Trials, Technology Assessments and Economic Evaluations                                                                                         | 906        |
| #35        | #34 Publication Year from 2009 to 2017                                                                                                                                                                          | 561        |
| <b>#36</b> | <b>#32 or #35</b>                                                                                                                                                                                               | <b>587</b> |

## 1.1.2 Study registry

**Table A-4 US National Institute of Health's (NIH) clinical trial registry (ClinicalTrials.gov)**

|                                                                                     |                                                                                                                                                                                                                                                                                                                                                                                                                                                                                                                                                                                                                                                                                                                                                                                                                                                                                                                                                                                                                                                                                                                                                                                                                                                                                                                                                                                                                                                                                                                                                                                                                                                                                                                                                                                                                                                                                                                                                                                                                                                                                                                                                                                                                                                                                                                                                                                                                                                                                                                                                                                                                                                                                                                                                                                                                                                                                                                                                                                                                                                                                                                                                                                                                                                                                                                                                                                                                                                                                                                                                                                                                                                                                                                                                                                                                                                                                                                                                                                                                                                                                                                                                                                                                                                                                                                                                                                                                                                                                                                                             |
|-------------------------------------------------------------------------------------|---------------------------------------------------------------------------------------------------------------------------------------------------------------------------------------------------------------------------------------------------------------------------------------------------------------------------------------------------------------------------------------------------------------------------------------------------------------------------------------------------------------------------------------------------------------------------------------------------------------------------------------------------------------------------------------------------------------------------------------------------------------------------------------------------------------------------------------------------------------------------------------------------------------------------------------------------------------------------------------------------------------------------------------------------------------------------------------------------------------------------------------------------------------------------------------------------------------------------------------------------------------------------------------------------------------------------------------------------------------------------------------------------------------------------------------------------------------------------------------------------------------------------------------------------------------------------------------------------------------------------------------------------------------------------------------------------------------------------------------------------------------------------------------------------------------------------------------------------------------------------------------------------------------------------------------------------------------------------------------------------------------------------------------------------------------------------------------------------------------------------------------------------------------------------------------------------------------------------------------------------------------------------------------------------------------------------------------------------------------------------------------------------------------------------------------------------------------------------------------------------------------------------------------------------------------------------------------------------------------------------------------------------------------------------------------------------------------------------------------------------------------------------------------------------------------------------------------------------------------------------------------------------------------------------------------------------------------------------------------------------------------------------------------------------------------------------------------------------------------------------------------------------------------------------------------------------------------------------------------------------------------------------------------------------------------------------------------------------------------------------------------------------------------------------------------------------------------------------------------------------------------------------------------------------------------------------------------------------------------------------------------------------------------------------------------------------------------------------------------------------------------------------------------------------------------------------------------------------------------------------------------------------------------------------------------------------------------------------------------------------------------------------------------------------------------------------------------------------------------------------------------------------------------------------------------------------------------------------------------------------------------------------------------------------------------------------------------------------------------------------------------------------------------------------------------------------------------------------------------------------------------------------------------------|
| Study registry                                                                      | clinicaltrials.gov                                                                                                                                                                                                                                                                                                                                                                                                                                                                                                                                                                                                                                                                                                                                                                                                                                                                                                                                                                                                                                                                                                                                                                                                                                                                                                                                                                                                                                                                                                                                                                                                                                                                                                                                                                                                                                                                                                                                                                                                                                                                                                                                                                                                                                                                                                                                                                                                                                                                                                                                                                                                                                                                                                                                                                                                                                                                                                                                                                                                                                                                                                                                                                                                                                                                                                                                                                                                                                                                                                                                                                                                                                                                                                                                                                                                                                                                                                                                                                                                                                                                                                                                                                                                                                                                                                                                                                                                                                                                                                                          |
| URL                                                                                 | <a href="https://clinicaltrials.gov/ct2/search/advanced">https://clinicaltrials.gov/ct2/search/advanced</a><br><a href="https://clinicaltrials.gov/ct2/results/refine?show_xprt=Y">https://clinicaltrials.gov/ct2/results/refine?show_xprt=Y</a>                                                                                                                                                                                                                                                                                                                                                                                                                                                                                                                                                                                                                                                                                                                                                                                                                                                                                                                                                                                                                                                                                                                                                                                                                                                                                                                                                                                                                                                                                                                                                                                                                                                                                                                                                                                                                                                                                                                                                                                                                                                                                                                                                                                                                                                                                                                                                                                                                                                                                                                                                                                                                                                                                                                                                                                                                                                                                                                                                                                                                                                                                                                                                                                                                                                                                                                                                                                                                                                                                                                                                                                                                                                                                                                                                                                                                                                                                                                                                                                                                                                                                                                                                                                                                                                                                            |
| Date of Search                                                                      | Aug 17, 2017                                                                                                                                                                                                                                                                                                                                                                                                                                                                                                                                                                                                                                                                                                                                                                                                                                                                                                                                                                                                                                                                                                                                                                                                                                                                                                                                                                                                                                                                                                                                                                                                                                                                                                                                                                                                                                                                                                                                                                                                                                                                                                                                                                                                                                                                                                                                                                                                                                                                                                                                                                                                                                                                                                                                                                                                                                                                                                                                                                                                                                                                                                                                                                                                                                                                                                                                                                                                                                                                                                                                                                                                                                                                                                                                                                                                                                                                                                                                                                                                                                                                                                                                                                                                                                                                                                                                                                                                                                                                                                                                |
| <b>Advanced Search</b>                                                              |                                                                                                                                                                                                                                                                                                                                                                                                                                                                                                                                                                                                                                                                                                                                                                                                                                                                                                                                                                                                                                                                                                                                                                                                                                                                                                                                                                                                                                                                                                                                                                                                                                                                                                                                                                                                                                                                                                                                                                                                                                                                                                                                                                                                                                                                                                                                                                                                                                                                                                                                                                                                                                                                                                                                                                                                                                                                                                                                                                                                                                                                                                                                                                                                                                                                                                                                                                                                                                                                                                                                                                                                                                                                                                                                                                                                                                                                                                                                                                                                                                                                                                                                                                                                                                                                                                                                                                                                                                                                                                                                             |
| Search strategy (Expert Search),<br><b>With restriction to Studies with Results</b> | ( random OR randomized OR randomised OR RCT OR randomization OR randomisation ) AND NOT NOTEXT [FIRST-RECEIVED-RESULTS-DATE] AND ( Carcinoma, Renal Cell OR RCC OR mRCC OR aRCC OR ( renal OR kidney OR nephroid OR hypernephroid OR grawitz ) AND ( cancer OR cancers OR carcinoma OR carcinomas OR adenocarcinoma OR adenocarcinomas OR neoplasm OR neoplasms OR tumor OR tumors ) ) [DISEASE] AND ( cabozantinib OR "bms 907351" OR bms907351 OR "xl 184" OR xl184 OR Tivozanib OR "AV-951" AND or AV951 or AND "KRN 951" AND or KRN951 or Kil8951 or AND "kil-8951" OR sunitinib OR "su 011248" OR su011248 OR "su 11248" OR su11248 OR su010398 OR "su 010398" OR "su 10398" OR su10398 OR "pha-290940ad" OR pha290940ad OR Pazopanib OR GW786034 OR "GW 786034" OR GW780604 OR "GW 780604" OR sb710468 OR "sb 710468" OR immunotherapy OR "interferon alpha" OR "interferon alpha" OR "IFN alpha" OR "ifn alfa" OR alfaferone OR alferon OR "alpha ferone" OR cilferon OR ginterferon OR introma OR kemron OR leukinferon OR leukinferron OR "leukocyte interferon" OR "refecon a" OR "referon a3" OR sumiferon OR sumipheron OR veldona OR "Intron A" OR Alfatronol OR Glucoferon OR Urifron OR Roferon OR Laroferon OR Roceron OR ifnalpha OR ifnalfa OR "interleukin 2" OR "interleukin II" OR "il-2" OR il2 OR "Ro-23-6019" OR Ro236019 OR "Ro 236019" OR "RU 49637" OR RU49637 OR TCGF OR "T-Cell Growth Factor" OR "T-Cell Stimulating Factor" OR bioleukin OR proleukin OR aldesleukin OR tsf OR "Thymocyte Stimulating Factor" OR bevacizumab OR "rhuMAB-VEGF" AND or AND "abp 215" AND or ro4876646 or AND "nsc 704865" AND or AND "nsc704865" AND or AND "anti-vegf" OR temsirolimus OR "cci 779" OR "cell-cycle-inhibitor-779" OR nsc683864 OR "nsc 68386" OR sorafenib OR "bay 43-9006" OR "bay 439006" OR "bay43 9006" OR bay439006 OR "bay 545-9085" OR "bay 5459085" OR "bay545-9085" OR bay5459085 OR "bay 54-9085" OR "bay 549085" OR "bay54-9085" OR bay549085 ) [TREATMENT]                                                                                                                                                                                                                                                                                                                                                                                                                                                                                                                                                                                                                                                                                                                                                                                                                                                                                                                                                                                                                                                                                                                                                                                                                                                                                                                                                                                                                                                                                                                                                                                                                                                                                                                                                                                                                                                                                                                                                                                                                                                                                                                                                                                                                                                                                                                                                                                                                                                                                                                                        |
| Condition / Disease:                                                                | Carcinoma, Renal Cell OR RCC OR mRCC OR aRCC OR ( renal OR kidney OR nephroid OR hypernephroid OR grawitz ) AND ( cancer OR cancers OR carcinoma OR carcinomas OR adenocarcinoma OR adenocarcinomas OR neoplasm OR neoplasms OR tumor OR tumors )                                                                                                                                                                                                                                                                                                                                                                                                                                                                                                                                                                                                                                                                                                                                                                                                                                                                                                                                                                                                                                                                                                                                                                                                                                                                                                                                                                                                                                                                                                                                                                                                                                                                                                                                                                                                                                                                                                                                                                                                                                                                                                                                                                                                                                                                                                                                                                                                                                                                                                                                                                                                                                                                                                                                                                                                                                                                                                                                                                                                                                                                                                                                                                                                                                                                                                                                                                                                                                                                                                                                                                                                                                                                                                                                                                                                                                                                                                                                                                                                                                                                                                                                                                                                                                                                                           |
| Intervention / Treatment:                                                           | cabozantinib OR "bms 907351" OR bms907351 OR "xl 184" OR xl184 OR Tivozanib OR "AV-951" AND or AV951 or AND "KRN 951" AND or KRN951 or Kil8951 or AND "kil-8951" OR sunitinib OR "su 011248" OR su011248 OR "su 11248" OR su11248 OR su010398 OR "su 010398" OR "su 10398" OR su10398 OR "pha-290940ad" OR pha290940ad OR Pazopanib OR GW786034 OR "GW 786034" OR GW780604 OR "GW 780604" OR sb710468 OR "sb 710468" OR immunotherapy OR "interferon alpha" OR "interferon alpha" OR "IFN alpha" OR "ifn alfa" OR alfaferone OR alferon OR "alpha ferone" OR cilferon OR ginterferon OR introma OR kemron OR leukinferon OR leukinferron OR "leukocyte interferon" OR "refecon a" OR "referon a3" OR sumiferon OR sumipheron OR veldona OR "Intron A" OR Alfatronol OR Glucoferon OR Urifron OR Roferon OR Laroferon OR Roceron OR ifnalpha OR ifnalfa OR "interleukin 2" OR "interleukin II" OR "il-2" OR il2 OR "Ro-23-6019" OR Ro236019 OR "Ro 236019" OR "RU 49637" OR RU49637 OR TCGF OR "T-Cell Growth Factor" OR "T-Cell Stimulating Factor" OR bioleukin OR proleukin OR aldesleukin OR tsf OR "Thymocyte Stimulating Factor" OR bevacizumab OR "rhuMAB-VEGF" AND or AND "abp 215" AND or ro4876646 or AND "nsc 704865" AND or AND "nsc704865" AND or AND "anti-vegf" OR temsirolimus OR "cci 779" OR "cell-cycle-inhibitor-779" OR nsc683864 OR "nsc 68386" OR sorafenib OR "bay 43-9006" OR "bay 439006" OR "bay43 9006" OR bay439006 OR "bay 545-9085" OR "bay 5459085" OR "bay545-9085" OR bay5459085 OR "bay 54-9085" OR "bay 549085" OR "bay54-9085" OR bay549085                                                                                                                                                                                                                                                                                                                                                                                                                                                                                                                                                                                                                                                                                                                                                                                                                                                                                                                                                                                                                                                                                                                                                                                                                                                                                                                                                                                                                                                                                                                                                                                                                                                                                                                                                                                                                                                                                                                                                                                                                                                                                                                                                                                                                                                                                                                                                                                                                                                                                                                                                                                                                                                                                                                                                                                                                                                                                                                                                             |
| Other Terms                                                                         | ( random OR randomized OR randomised OR RCT OR randomization OR randomisation )                                                                                                                                                                                                                                                                                                                                                                                                                                                                                                                                                                                                                                                                                                                                                                                                                                                                                                                                                                                                                                                                                                                                                                                                                                                                                                                                                                                                                                                                                                                                                                                                                                                                                                                                                                                                                                                                                                                                                                                                                                                                                                                                                                                                                                                                                                                                                                                                                                                                                                                                                                                                                                                                                                                                                                                                                                                                                                                                                                                                                                                                                                                                                                                                                                                                                                                                                                                                                                                                                                                                                                                                                                                                                                                                                                                                                                                                                                                                                                                                                                                                                                                                                                                                                                                                                                                                                                                                                                                             |
| Study Results                                                                       | Studies with Results                                                                                                                                                                                                                                                                                                                                                                                                                                                                                                                                                                                                                                                                                                                                                                                                                                                                                                                                                                                                                                                                                                                                                                                                                                                                                                                                                                                                                                                                                                                                                                                                                                                                                                                                                                                                                                                                                                                                                                                                                                                                                                                                                                                                                                                                                                                                                                                                                                                                                                                                                                                                                                                                                                                                                                                                                                                                                                                                                                                                                                                                                                                                                                                                                                                                                                                                                                                                                                                                                                                                                                                                                                                                                                                                                                                                                                                                                                                                                                                                                                                                                                                                                                                                                                                                                                                                                                                                                                                                                                                        |
| URL                                                                                 | <a href="https://clinicaltrials.gov/ct2/results?show_xprt=Y&amp;xprt=%28+random+OR+randomized+OR+randomise+d+OR+RCT+OR+randomization+OR+randomisation+%29+AND+NOT+NOTEXT+%5BFIRST-RECEIVED-RESULTS-DATE%5D+AND+%28+Carcinoma%2C+Renal+Cell+OR+RCC+OR+mRCC+OR+aRCC+OR+%28+renal+OR+kidney+OR+nephroid+OR+hypernephroid+OR+grawitz+%29+AND+%28+cancer+OR+cancers+OR+carcinoma+OR+carcinomas+OR+adenocarcinoma+OR+adenocarcinomas+OR+neoplasm+OR+neoplasms+OR+tumor+OR+tumors+%29+%29+%5BDISEASE%5D+AND+%28+cabozantinib+OR+%22bms+907351%22+OR+bms907351+OR+%22xl+184%22+OR+xl184+OR+Tivozanib+OR+%22AV-951%22+AND+or+AV951+or+AND+%22KRN+951%22+AND+or+KRN951+or+Kil8951+or+AND+%22kil-8951%22+OR+sunitinib+OR+%22su+011248%22+OR+su011248+OR+%22su+11248%22+OR+su11248+OR+su010398+OR+%22su+010398%22+OR+%22su+10398%22+OR+su10398+OR+%22pha-290940ad%22+OR+pha290940ad+OR+Pazopanib+OR+GW786034+OR+%22GW+786034%22+OR+GW780604+OR+%22GW+780604%22+OR+sb710468+OR+%22sb+710468%22+OR+immunotherapy+OR+%22interferon+alpha%22+OR+%22interferon+alpha%22+OR+%22IFN+alpha%22+OR+%22ifn+alfa%22+OR+alfaferone+OR+alferon+OR+%22alpha+ferone%22+OR+cilferon+OR+ginterferon+OR+introma+OR+kemron+OR+leukinferon+OR+leukinferron+OR+%22leukocyte+interferon%22+OR+%22refecon+a%22+OR+%22referon+a3%22+OR+sumiferon+OR+sumipheron+OR+veldona+OR+%22Intron+A%22+OR+Alfatronol+OR+Glucoferon+OR+Urifron+OR+Roferon+OR+Laroferon+OR+Roceron+OR+ifnalpha+OR+ifnalfa+OR+%22interleukin+2%22+OR+%22interleukin+II%22+OR+%22il-2%22+OR+il2+OR+%22Ro-23-6019%22+OR+Ro236019+OR+%22Ro+236019%22+OR+%22RU+49637%22+OR+RU49637+OR+TCGF+OR+%22T-Cell+Growth+Factor%22+OR+%22T-Cell+Stimulating+Factor%22+OR+bioleukin+OR+proleukin+OR+aldesleukin+OR+tsf+OR+%22Thymocyte+Stimulating+Factor%22+OR+bevacizumab+OR+%22rhuMAB-VEGF%22+AND+or+AND+%22abp+215%22+AND+or+ro4876646+or+AND+%22nsc+704865%22+AND+or+AND+%22nsc704865%22+AND+or+AND+%22anti-vegf%22+OR+temsirolimus+OR+%22cci+779%22+OR+%22cell-cycle-inhibitor-779%22+OR+nsc683864+OR+%22nsc+68386%22+OR+sorafenib+OR+%22bay+43-9006%22+OR+%22bay+439006%22+OR+%22bay43+9006%22+OR+bay439006+OR+%22bay+545-9085%22+OR+%22bay+5459085%22+OR+%22bay545-9085%22+OR+bay5459085+OR+%22bay+54-9085%22+OR+%22bay+549085%22+OR+bay549085">https://clinicaltrials.gov/ct2/results?show_xprt=Y&amp;xprt=%28+random+OR+randomized+OR+randomise+d+OR+RCT+OR+randomization+OR+randomisation+%29+AND+NOT+NOTEXT+%5BFIRST-RECEIVED-RESULTS-DATE%5D+AND+%28+Carcinoma%2C+Renal+Cell+OR+RCC+OR+mRCC+OR+aRCC+OR+%28+renal+OR+ki dney+OR+nephroid+OR+hypernephroid+OR+grawitz+%29+AND+%28+cancer+OR+cancers+OR+carcino ma+OR+carcinomas+OR+adenocarcinoma+OR+adenocarcinomas+OR+neoplasm+OR+neoplasms+OR+t umor+OR+tumors+%29+%29+%5BDISEASE%5D+AND+%28+cabozantinib+OR+%22bms+907351%22+O R+bms907351+OR+%22xl+184%22+OR+xl184+OR+Tivozanib+OR+%22AV-951%22+AND+or+AV951+or+AND+%22KRN+951%22+AND+or+KRN951+or+Kil8951+or+AND+%22kil-8951%22+OR+sunitinib+OR+%22su+011248%22+OR+su011248+OR+%22su+11248%22+OR+su11248+ OR+su010398+OR+%22su+010398%22+OR+%22su+10398%22+OR+su10398+OR+%22pha-290940ad%22+OR+pha290940ad+OR+Pazopanib+OR+GW786034+OR+%22GW+786034%22+OR+GW780604+OR+%22GW+780604%22+OR+sb710468+OR+%22sb+710468%22+OR+immunotherapy+OR+%22interferon+alpha%22+OR+%22interferon+alpha%22+OR+%22IFN+alpha%22+OR+%22ifn+alfa%22+OR+alfaferone+OR+alferon+OR+%22alpha+ferone%22+OR+cilferon+OR+ginterferon+OR+introma+OR+kemron+OR+leukinferon+OR+leukinferron+OR+%22leukocyte+interferon%22+OR+%22refecon+a%22+OR+%22referon+a3%22+OR+sumiferon+OR+sumipheron+OR+veldona+OR+%22Intron+A%22+OR+Alfatronol+OR+Glucoferon+OR+Urifron+OR+Roferon+OR+Laroferon+OR+Roceron+OR+ifnalpha+OR+ifnalfa+OR+%22interleukin+2%22+OR+%22interleukin+II%22+OR+%22il-2%22+OR+il2+OR+%22Ro-23-6019%22+OR+Ro236019+OR+%22Ro+236019%22+OR+%22RU+49637%22+OR+RU49637+OR+TCGF+OR+%22T-Cell+Growth+Factor%22+OR+%22T-Cell+Stimulating+Factor%22+OR+bioleukin+OR+proleukin+OR+aldesleukin+OR+tsf+OR+%22Thymocyte+Stimulating+Factor%22+OR+bevacizumab+OR+%22rhuMAB-VEGF%22+AND+or+AND+%22abp+215%22+AND+or+ro4876646+or+AND+%22nsc+704865%22+AND+or+AND+%22nsc704865%22+AND+or+AND+%22anti-veg f%22+OR+temsirolimus+OR+%22cci+779%22+OR+%22cell-cycle-inhibitor-779%22+OR+nsc683864+OR+%22nsc+68386%22+OR+sorafenib+OR+%22bay+43-9006%22+OR+%22bay+439006%22+OR+%22bay43+9006%22+OR+bay439006+OR+%22bay+545-9085%22+OR+%22bay+5459085%22+OR+%22bay545-9085%22+OR+bay5459085+OR+%22bay+54-9085%22+OR+%22bay+549085%22+OR+bay549085</a> |

|  |                                                                                                                                                                                                                                                                                                                                                                                                                                                                                                                                                                                                                                                                                                                                                                                                                                                                                                                                                                                                                                                                                                                                                                                                                                                                                                                                                                                                                                                                                                 |
|--|-------------------------------------------------------------------------------------------------------------------------------------------------------------------------------------------------------------------------------------------------------------------------------------------------------------------------------------------------------------------------------------------------------------------------------------------------------------------------------------------------------------------------------------------------------------------------------------------------------------------------------------------------------------------------------------------------------------------------------------------------------------------------------------------------------------------------------------------------------------------------------------------------------------------------------------------------------------------------------------------------------------------------------------------------------------------------------------------------------------------------------------------------------------------------------------------------------------------------------------------------------------------------------------------------------------------------------------------------------------------------------------------------------------------------------------------------------------------------------------------------|
|  | <p> <a href="#">290940ad%22+OR+pha290940ad+OR+Pazopanib+OR+GW786034+OR+%22GW+786034%22+OR+GW780604+OR+%22GW+780604%22+OR+sb710468+OR+%22sb+710468%22+OR+immunotherapy+OR+%22interferon+alpha%22+OR+%22interferon+alpha%22+OR+%22IFN+alpha%22+OR+%22ifn+alfa%22+OR+alfaferone+OR+alferon+OR+%22alpha+ferone%22+OR+cilferon+OR+ginterferon+OR+introma+OR+ke mron+OR+leukinferon+OR+leukinferron+OR+%22leukocyte+interferon%22+OR+%22refecon+a%22+OR+%22referon+a3%22+OR+sumiferon+OR+sumipheron+OR+veldona+OR+%22Intron+A%22+OR+Alfatro nol+OR+Glucoferon+OR+Urifron+OR+Roferon+OR+Laroferon+OR+Roceron+OR+ifnalpha+OR+ifnalfa+O R+%22interleukin+2%22+OR+%22interleukin+il%22+OR+%22il-2%22+OR+il2+OR+%22Ro-23-6019%22+OR+Ro236019+OR+%22Ro+236019%22+OR+%22RU+49637%22+OR+RU49637+OR+TCGF+O R+%22T-Cell+Growth+Factor%22+OR+%22T-Cell+Stimulating+Factor%22+OR+bioleukin+OR+proleukin+OR+aldesleukin+OR+tsf+OR+%22Thymocyte +Stimulating+Factor%22+OR+bevacizumab+OR+%22rhuMab-VEGF%22+AND+or+AND+%22abp+215%22+AND+or+ro4876646+or+AND+%22nsc+704865%22+AND+o r+AND+%22nsc704865%22+AND+or+AND+%22anti-vegf%22+OR+temsirrolimus+OR+%22cci+779%22+OR+%22cell-cycle-inhibitor-779%22+OR+nsc683864+OR+%22nsc+68386%22+OR+sorafenib+OR+%22bay+43-9006%22+OR+%22bay+439006%22+OR+%22bay43+9006%22+OR+bay439006+OR+%22bay+545-9085%22+OR+%22bay+5459085%22+OR+%22bay545-9085%22+OR+bay5459085+OR+%22bay+54-9085%22+OR+%22bay+549085%22+OR+%22bay54-9085%22+OR+bay549085+%29+%5BTREATMENT%5D</a> </p> |
|--|-------------------------------------------------------------------------------------------------------------------------------------------------------------------------------------------------------------------------------------------------------------------------------------------------------------------------------------------------------------------------------------------------------------------------------------------------------------------------------------------------------------------------------------------------------------------------------------------------------------------------------------------------------------------------------------------------------------------------------------------------------------------------------------------------------------------------------------------------------------------------------------------------------------------------------------------------------------------------------------------------------------------------------------------------------------------------------------------------------------------------------------------------------------------------------------------------------------------------------------------------------------------------------------------------------------------------------------------------------------------------------------------------------------------------------------------------------------------------------------------------|

Note: The original search string in clinicaltrials.gov included an error. When Boolean operators “or” were used in lowercase, clinicaltrials.gov added some AND-Operators. The search was reproduced with a corrected search string and yielded 42 instead of the initial 41 hits. 41 hits were identical to the initial search. The additionally identified trial was excluded after review.

## 1.2 Search Results

### 1.2.1 Overview of the results of the literature search

**Table A-5 Overview of the results-Bibliographic search**

| Database                                                                 | Search Filter for RCT                                                                           | Search Filter for Systematic Reviews                                             | Intervention                                                                                | Restrictions | No. of findings |
|--------------------------------------------------------------------------|-------------------------------------------------------------------------------------------------|----------------------------------------------------------------------------------|---------------------------------------------------------------------------------------------|--------------|-----------------|
| Medline                                                                  | Cochrane Highly Sensitive Search Strategy for RCT: sensitivity-and precision-maximizing version | SIGN Search Strategy Systematic Reviews                                          | Cabozantinib, Tivozanib                                                                     | 1980 - 2017  | 65              |
| Medline                                                                  | Cochrane Highly Sensitive Search Strategy for RCT: sensitivity-and precision-maximizing version | SIGN Search Strategy Systematic Reviews                                          | Sunitinib, Pazopanib, Immunotherapy (Ifn-Alpha, Il-2), Bevacizumab, Temsirolimus, Sorafenib | 2009 - 2017  | 1030            |
| <b>Total Medline</b>                                                     |                                                                                                 |                                                                                  |                                                                                             |              | <b>1058</b>     |
| Embase                                                                   | SIGN Search Strategy Randomized Controlled Trials                                               | SIGN Search Strategy Systematic Reviews                                          | Cabozantinib, Tivozanib                                                                     | 1980 - 2017  | 337             |
| Embase                                                                   | SIGN Search Strategy Randomized Controlled Trials                                               | SIGN Search Strategy Systematic Reviews                                          | Sunitinib, Pazopanib, Immunotherapy (Ifn-Alpha, Il-2), Bevacizumab, Temsirolimus, Sorafenib | 2009 - 2017  | 3367            |
| <b>Total Embase</b>                                                      |                                                                                                 |                                                                                  |                                                                                             |              | <b>3449</b>     |
| Cochrane Library (Cochrane CENTRAL, Cochrane Reviews, HTA, DARE, NHSEED) | None (restriction to Cochrane Central Register of Controlled Trials)                            | None (restriction to Cochrane Database of Systematic Reviews, DARE, NHSEED, HTA) | Cabozantinib, Tivozanib                                                                     | 1980 - 2017  | 53              |
| Cochrane Library (Cochrane CENTRAL, Cochrane Reviews, HTA, DARE, NHSEED) | None (restriction to Cochrane Central Register of Controlled Trials)                            | None (restriction to Cochrane Database of Systematic Reviews, DARE, NHSEED, HTA) | Sunitinib, Pazopanib, Immunotherapy (Ifn-Alpha, Il-2), Bevacizumab, Temsirolimus, Sorafenib | 2009 - 2017  | 561             |
| <b>Total Cochrane Library</b>                                            |                                                                                                 |                                                                                  |                                                                                             |              | <b>587</b>      |
| <b>Total</b>                                                             |                                                                                                 |                                                                                  |                                                                                             |              | <b>5094</b>     |
| <b>Findings without 1086 duplicates</b>                                  |                                                                                                 |                                                                                  |                                                                                             |              | <b>4008</b>     |

**Table A-6 Overview of the results-Study registries**

| Database           | Intervention                                                                                                         | Restrictions         | No. of findings |
|--------------------|----------------------------------------------------------------------------------------------------------------------|----------------------|-----------------|
| ClinicalTrials.gov | Cabozantinib, Tivozanib, Sunitinib, Pazopanib, Immunotherapy (Ifn-Alpha, Il-2), Bevacizumab, Temsirolimus, Sorafenib | Studies with Results | 41              |

### 1.3 Inclusion and Exclusion Criteria

Table A-7 Summary of the review inclusion and exclusion criteria

| Category            | Inclusion criteria                                                                                                                                                                                                                                                                                                                                                                                                              | Exclusion criteria                                                    |
|---------------------|---------------------------------------------------------------------------------------------------------------------------------------------------------------------------------------------------------------------------------------------------------------------------------------------------------------------------------------------------------------------------------------------------------------------------------|-----------------------------------------------------------------------|
| <b>Population</b>   | Adult patients with advanced or metastatic renal cell carcinoma, previously untreated                                                                                                                                                                                                                                                                                                                                           | > Patients <18 years of age<br>> Healthy subjects<br>> Animal studies |
| <b>Intervention</b> | The following interventions in the first-line setting:<br>> Cabozantinib (Cabometyx™) [monotherapy]<br>> Sunitinib (Sutent®) [monotherapy]<br>> Pazopanib (Votrient®) [monotherapy]<br>> Interferon alfa [monotherapy]<br>> Interleukin-2 [monotherapy]<br>> Sorafenib (Nexavar®) [monotherapy]<br>> Bevacizumab (Avastin®) + Interferon alfa<br>> Temsirolimus (Torisel®) [monotherapy]<br>> Tivozanib (Fotivda) [monotherapy] | Combination therapies of listed interventions                         |
| <b>Comparator</b>   | > Any from the included list<br>> Placebo<br>> Best supportive care (BSC)                                                                                                                                                                                                                                                                                                                                                       |                                                                       |
| <b>Outcome</b>      | > Overall Survival (OS)<br>> Progression-free survival (PFS)<br>> Treatment discontinuation<br>> Adverse events (AE) (incidence of AE, SAE, grade 3/4)                                                                                                                                                                                                                                                                          |                                                                       |
| <b>Study design</b> | > RCT<br>> Letters reporting a RCT<br>> Systematic reviews, meta-analyses, HTA [for screening of bibliographies only, thereafter excluded]                                                                                                                                                                                                                                                                                      |                                                                       |
| <b>Language</b>     | English, French, German, Italian, Spanish                                                                                                                                                                                                                                                                                                                                                                                       |                                                                       |
| <b>Country</b>      | No restrictions                                                                                                                                                                                                                                                                                                                                                                                                                 |                                                                       |
| <b>Search time</b>  | 1980 onwards                                                                                                                                                                                                                                                                                                                                                                                                                    |                                                                       |

## 2 Network plots

### 2.1 Network of intermediate risk PFS

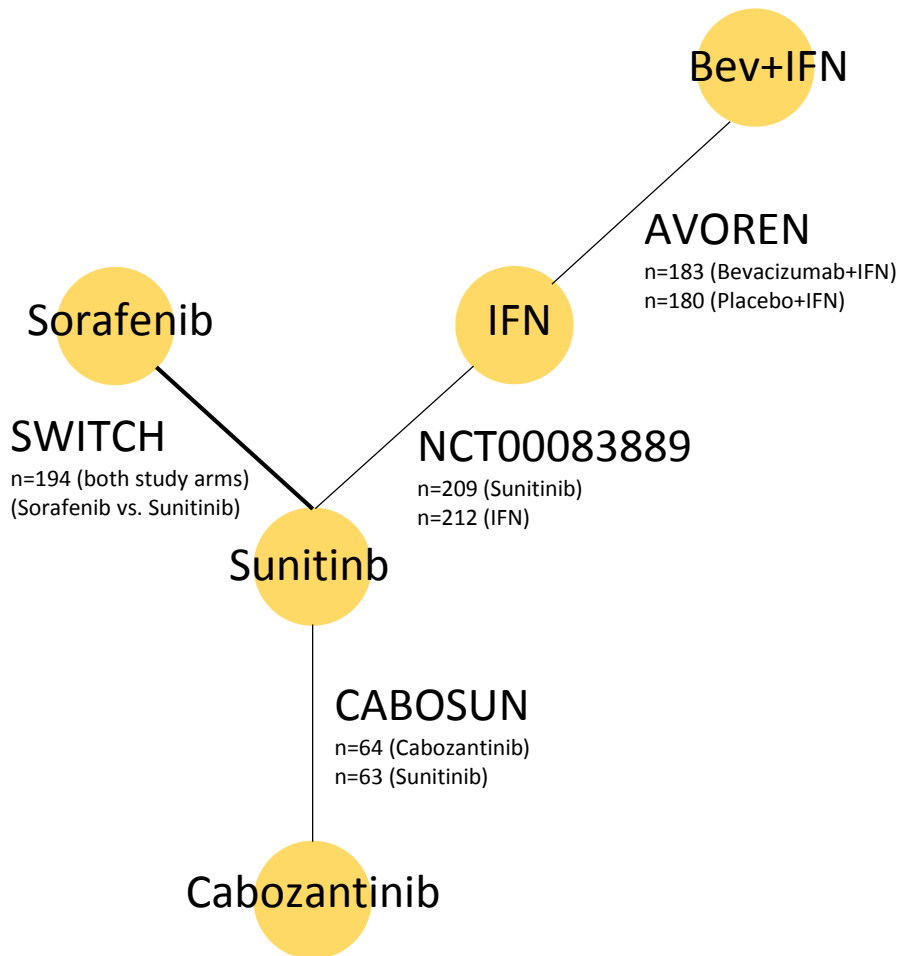

**Fig A-1 Network of intermediate risk PFS**

Bev: bevacizumab; IFN: Interferon

## 2.2 Network of poor risk PFS

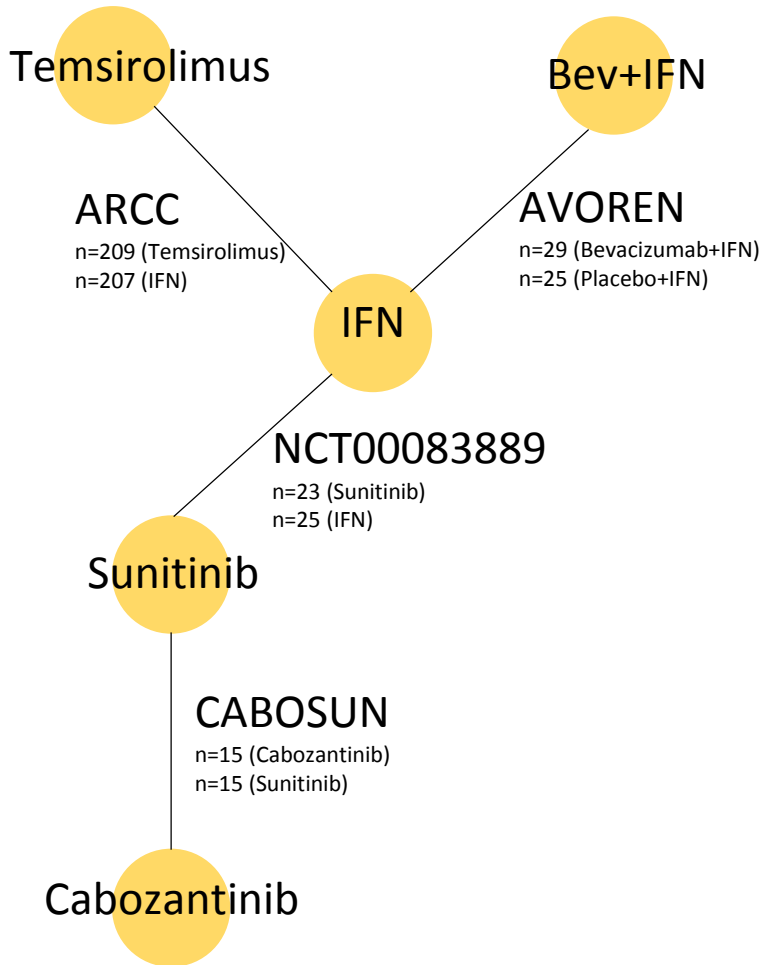

**Fig A-2 Network of poor risk PFS**

Bev: bevacizumab; IFN: Interferon

### 2.3 Network of overall PFS

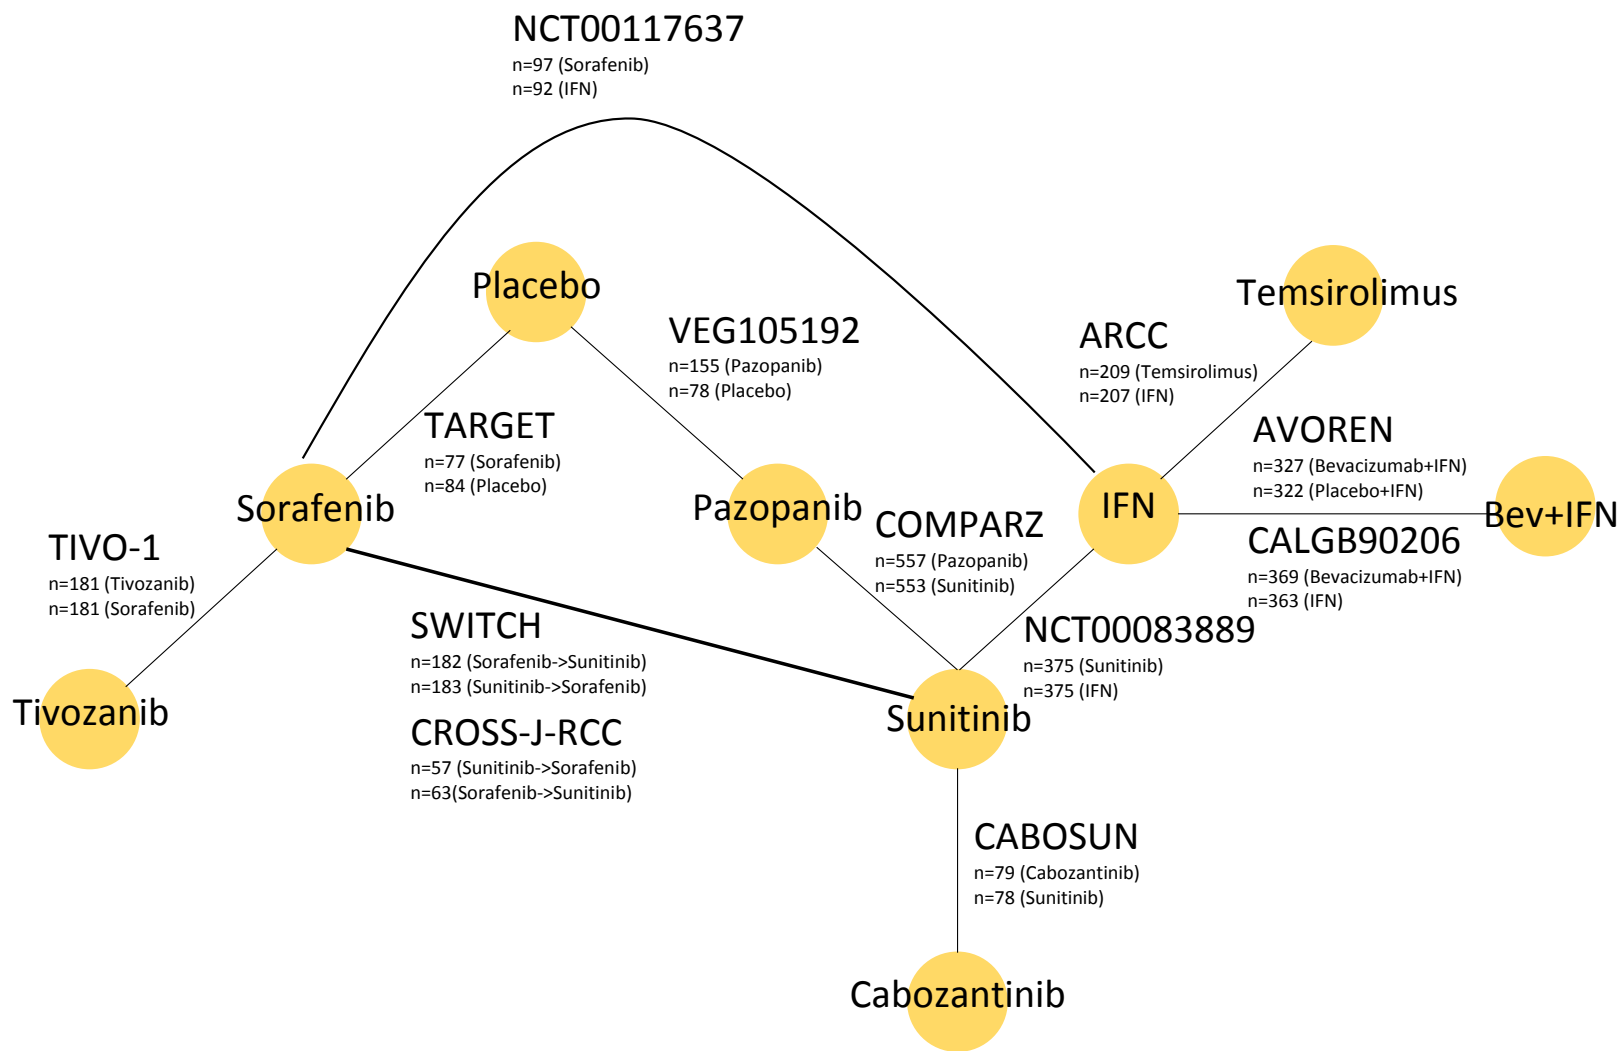

**Fig A-3 Network of overall PFS**

Bev: bevacizumab; IFN: Interferon



## 2.4 Network of intermediate risk OS

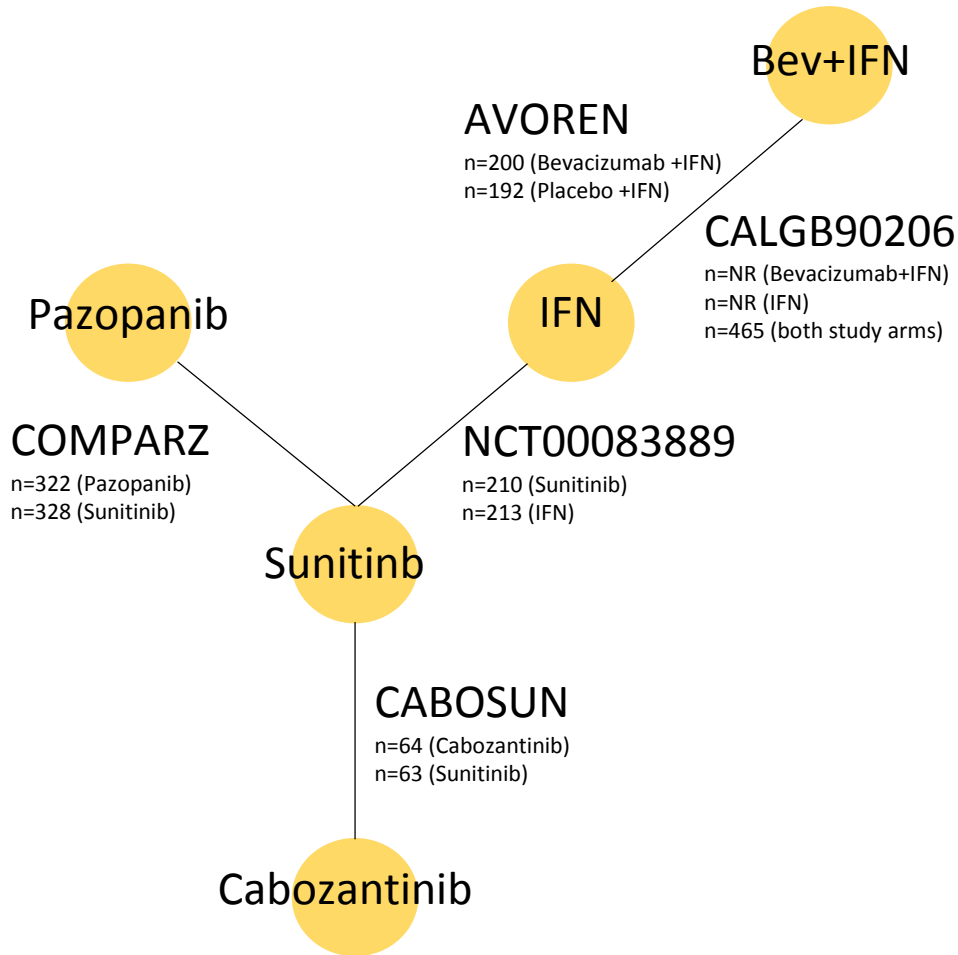

**Fig A-4 Network of intermediate risk OS**

Bev: bevacizumab; IFN: Interferon; NR=Not reported

**2.5 Network of poor risk OS**

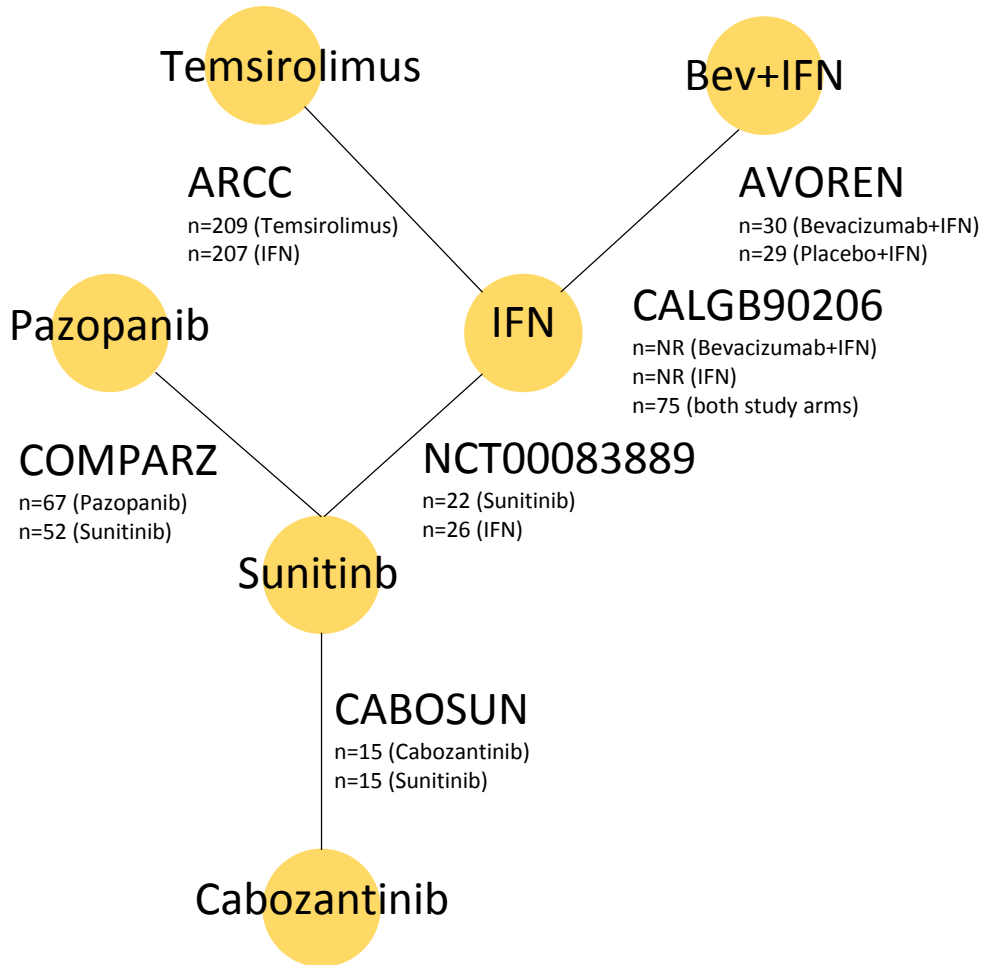

**Fig A-5 Network of poor risk OS**

Bev: bevacizumab; IFN: Interferon; NR=Not reported

## 2.6 Network of overall OS

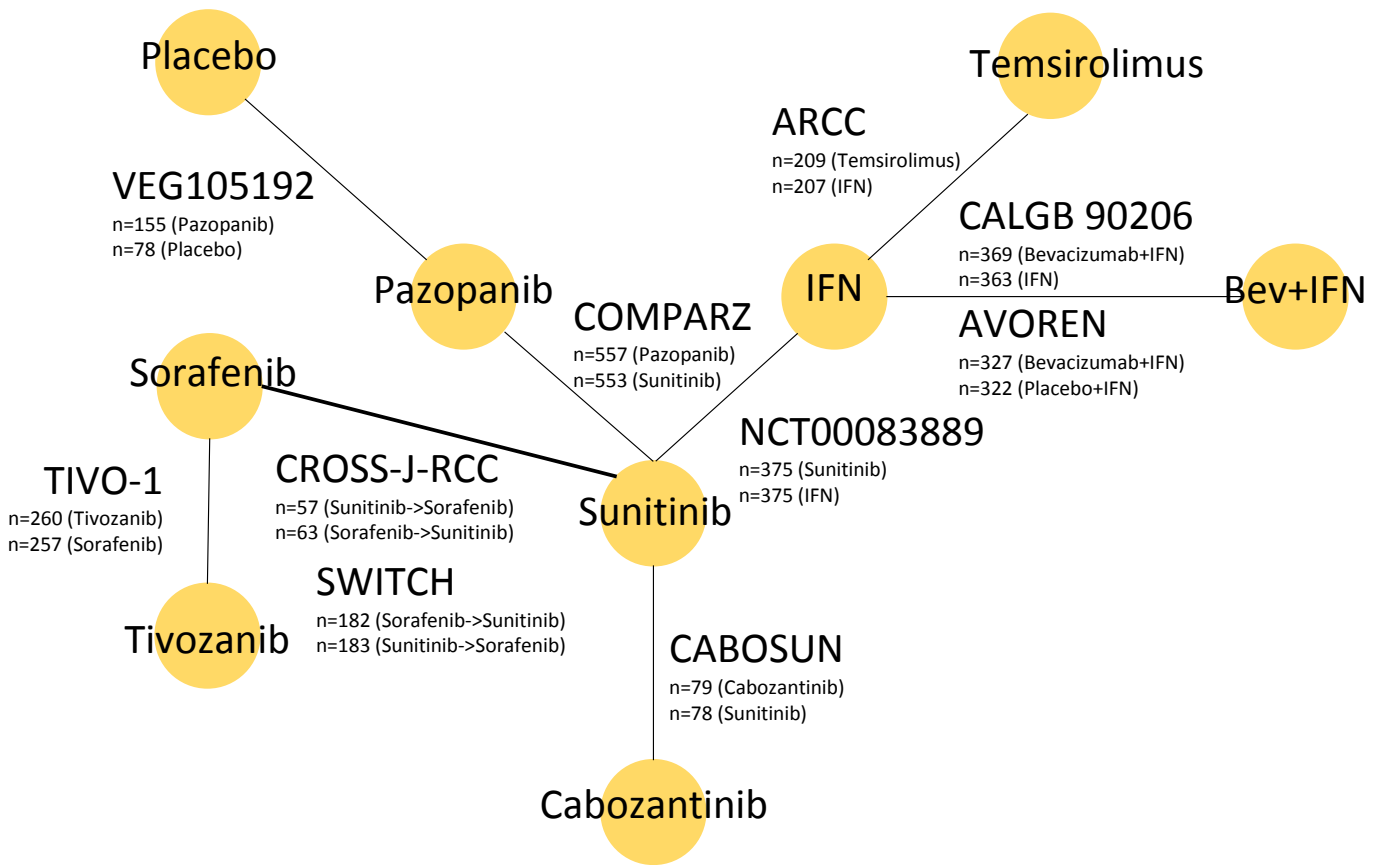

**Fig A-6 Network of overall OS**

Bev: bevacizumab; IFN: Interferon
